# Supplementary material
Source: MDPI journal article supplement (https://www.mdpi.com/2073-4441/13/19/2785)
Supplement: s1 [file s1 › water-1344412-supplementary.pdf]

## Supplementary Material

# Photocatalytic Bactericidal Performance of LaFeO<sub>3</sub> under Solar Light in the presence of Natural Organic Matter: Spectroscopic and Mechanistic Evaluation

Birben Nazmiye Cemre <sup>1</sup>, Lale Ezgi <sup>1</sup>, Pelosato Renato <sup>2</sup>, Turkten Nazli <sup>3</sup>, Natali Sora Isabella <sup>2</sup> and Bekbolet Miray <sup>1</sup>

<sup>1</sup> Institute of Environmental Sciences, Bogazici University, Istanbul, Turkey.

<sup>2</sup> Department of Engineering and Applied Sciences, University of Bergamo, Dalmine, Italy

<sup>3</sup> Department of Chemistry, Faculty of Arts and Sciences, Kirsehir Ahi Evran University, Kirsehir, Turkey.

## Kinetic Modeling

Logarithmic decay profiles of *E. coli* cell counts indicated that inactivation kinetics could be well-expressed by the first-order model:

$$\text{Rate (R)} = -dN/dt = kN$$

R: first-order rate (CFU/mL min),

N: *E. coli* count, CFU/mL at time t,

t: irradiation time, min,

k: first-order reaction rate constant, min<sup>-1</sup>.

Half-life (t<sub>1/2</sub>, min) could easily be calculated by the following equation, t<sub>1/2</sub> = 0.692/k.

## 1. Spectroscopic Characterization of NOM Compounds

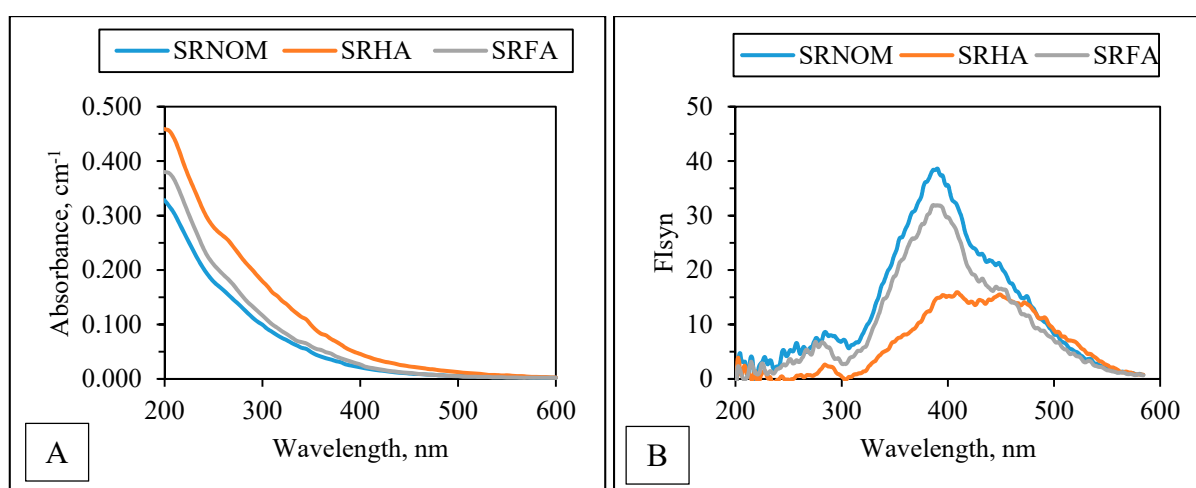

**Figure S1.** UV-vis (A) and synchronous scan fluorescence (B) spectral features of NOM compounds.

**Table 1.** Specified and specific UV-vis and fluorescence parameters of NOM compounds.

| NOM origin | Color <sub>436</sub> | UV <sub>365</sub> | UV <sub>280</sub> | UV <sub>254</sub> | F <sub>I<sub>syn</sub></sub> | DOC  | SUVA <sub>254</sub> | SFI <sub>syn</sub> |
|------------|----------------------|-------------------|-------------------|-------------------|------------------------------|------|---------------------|--------------------|
| SRNOM      | 0.014                | 0.041             | 0.132             | 0.175             | 14.8                         | 4.19 | 4.18                | 3.53               |
| SRHA       | 0.035                | 0.092             | 0.237             | 0.287             | 13.7                         | 3.95 | 7.27                | 3.47               |
| SRFA       | 0.013                | 0.046             | 0.155             | 0.205             | 11.9                         | 4.52 | 4.53                | 2.63               |

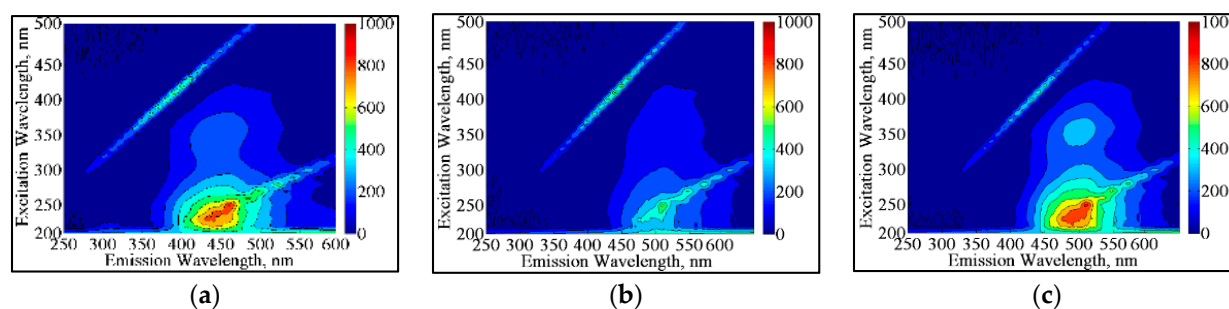

Figure S2. EEM fluorescence spectral features of IHSS NOM compounds: (a) SRNOM; (b) SRMA; (c) SRFA.

## 2. Acidic Functional Groups of NOM Compounds

Table S2. Acid functional groups of NOM compounds.

|       | Carboxyl | Phenolic | Q <sub>1</sub> | LogK <sub>1</sub> | n <sub>1</sub> | Q <sub>2</sub> | LogK <sub>2</sub> | n <sub>2</sub> |
|-------|----------|----------|----------------|-------------------|----------------|----------------|-------------------|----------------|
| SRNOM | 9.85     | 3.94     | 10.57          | 3.94              | 3.60           | 2.61           | 9.74              | 1.19           |
| SRHA  | 9.13     | 3.72     | 9.74           | 4.35              | 3.30           | 4.48           | 10.44             | 1.73           |
| SRFA  | 11.17    | 2.84     | 11.66          | 3.76              | 3.24           | 2.05           | 9.84              | 1.45           |

Carboxyl is the charge density (meq/g C) at pH 8.0; Phenolic is two times the change in charge density (meq/g C) between pH 8.0 and pH 10.0. The overall charge density (in meq/g C) of a humic substance increases systematically with pH (or with the concentration of H<sup>+</sup>). The equation on the right, known historically as a modified Henderson-Hasselbalch equation for two classes of binding sites, was used to fit titration data and obtain the set of model fitting parameters in this table. The fitting parameters of the model were obtained by a nonlinear least-squares fit of the model to aggregated sets of replicate titration data. Q<sub>1</sub> and Q<sub>2</sub> are the maximum charge densities of the two classes of binding sites, Log K<sub>1</sub> and Log K<sub>2</sub> are the mean log K values for proton binding by the two classes of sites, and n<sub>1</sub> and n<sub>2</sub> are empirical parameters that control the width (in log K) of a class of proton binding sites. N is the number of fitted titration data points, and RMSE is the root mean-square error for fitting this model to the data (see Reference). This model, also known in more recent literature as a Langmuir-Freundlich equation, is the primary building block of the NICA class of models.

<http://humic-substances.org/acidic-functional-groups-of-ihss-samples/> (accessed on 03 March 2021)

## 3. Photochemical and Photocatalytic Reactions Taking Place in the Presence of *E. coli* and NOM Analogue Compounds:

Based on this system description, “bacteria, organic matter and photocatalyst” consortium was subjected to irradiation *i.e.* photocatalysis. Simultaneously operating various degradation pathways could be described as; i. photolytic action on sole *E. coli* and photolysis of sole NOM analogue compounds, ii. photolytic action on “*E. coli* and NOM analogue compounds” binary system, iii. photocatalysis of sole *E. coli*, photocatalysis of sole NOM analogue compounds, and iv. photocatalysis of binary system composed of “*E. coli* and NOM analogue compounds”.

NOM compounds mainly express a supramolecular structure composed of diverse structural groups expressing photosensitization properties that could form radical species such as HO•, <sup>1</sup>O<sub>2</sub> and triplet states as <sup>3</sup>NOM\*. <sup>3</sup>NOM\* could further react through electron or hydrogen transfer oxidation mechanisms [1–3].

$\text{NOM} + h\nu \rightarrow {}^1\text{NOM}^* \rightarrow {}^3\text{NOM}^*$  excitation followed by inter-system crossing

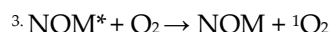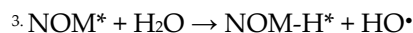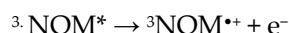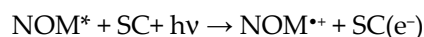

Electron trapping by semiconductor particles (SC) reduces  $\text{e}^-/\text{h}^+$  recombination rate thereby indirectly enhances ROS formation. On the other hand, decrease of  $\text{HO}^\bullet$  generation by NOM sub-fractions was reported for various photocatalysts ( $\text{TiO}_2$ ,  $\text{ZnO}$ , and  $\text{Fe}_2\text{O}_3$ ) with FA inhibiting  $\text{HO}^\bullet$  generation more than HA [55]. Singlet oxygen generation rate was dependent both on NOM and photocatalyst type. FA was more efficient than HA. Deactivation pathway of  ${}^1\text{O}_2$  in the solution bulk proceeds through collisions with  $\text{H}_2\text{O}$ .  ${}^1\text{O}_2$  has a micro-heterogeneous distribution within NOM matrix and could have higher concentrations when confined in the hydrophobic sites therefore possibly could only react in the vicinity of these centers. Hydrophobic cores would be more abundant in high molecular weight fractions of NOM.

#### Formation of reactive oxygen species:

Exposure of natural waters to solar irradiation produces ROS *i.e.*  $\text{HO}^\bullet$ ,  ${}^1\text{O}_2$ ,  $\text{O}_2^{\bullet-}$ ,  $\text{HO}_2^\bullet$  as well as  $\text{e}_{\text{aq}}^-$  via various reactions. Production of singlet oxygen  ${}^1\text{O}_2$  [4] and hydrated electron  $\text{e}_{\text{aq}}^-$  [5] have been very well documented [6].

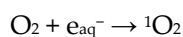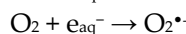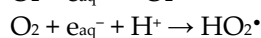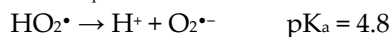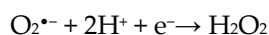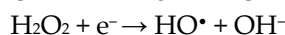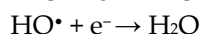

Reaction of  $\text{HO}_2^\bullet$  and  $\text{O}_2^{\bullet-}$  leading to the formation of  $\text{H}_2\text{O}_2$  preferentially predominates over slow termination reactions in between two  $\text{HO}_2^\bullet$  or two  $\text{O}_2^{\bullet-}$  radicals

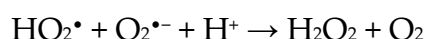

Upon solar light simulated irradiation conditions, the above given reactions (reaction numbers) and reactions (reaction numbers) occur leading to enhanced ROS formation complementary to those produced by photocatalysis. Therefore, under highly oxidizing conditions inactivation of *E. coli* as well as degradation of organic matter simultaneously take place.

#### 4. FTIR Spectral Features

**Table S3.** Fourier Transform Infrared spectroscopic bands related to *E. coli* (italics) and NOM.

| Band, cm <sup>-1</sup>     | Assignment                                                                                                                                                                                              |
|----------------------------|---------------------------------------------------------------------------------------------------------------------------------------------------------------------------------------------------------|
| 3450–3300                  | Associated O–H stretching (alcohols, phenols and carboxylic groups),<br>N–H stretching (trace/minor), hydrogen-bonded OH                                                                                |
| 3400–3600<br>~3500<br>3100 | <i>Amide A, N–H stretching vibration mostly related to hydrogen bonding</i><br><i>Amide B, N–H stretching vibration related amide II</i>                                                                |
| 3080–3030                  | Aromatic C–H stretching                                                                                                                                                                                 |
| 2950–2840                  | <i>Asymmetric and symmetric aliphatic C–H stretching vibrations (CH<sub>3</sub> and CH<sub>2</sub>) mainly referred to lipids</i>                                                                       |
| 2935–2925, 2850            | Asymmetric and symmetric C–H stretching of CH <sub>2</sub> group                                                                                                                                        |
| 1725–1710                  | C=O stretching of carboxylic groups (COOH, aldehydes and ketones)                                                                                                                                       |
| 1760–1600                  | <i>C=O and C–N stretching vibrations of amide I groups</i>                                                                                                                                              |
| 1660–1630                  | C=O stretching of amide groups (amide I band), C=O of quinone and/or H-bonded conjugated ketones                                                                                                        |
| 1620–1600<br>1640–1600     | Aromatic C=C skeletal vibrations, symmetric stretching band of COO <sup>-</sup> ,<br>C=O stretching in cyclic and alicyclic compounds, ketones and quinones                                             |
| 1620                       | <i>H–O stretching vibration related to H<sub>2</sub>O absorption</i>                                                                                                                                    |
| 1540–1510<br>1512–1506     | N–H deformation and C=N stretching (amide II band), aromatic C=C stretching                                                                                                                             |
| 1575                       | Asymmetric stretching band of COO <sup>-</sup> in carboxylic acid salts,<br><i>Aspartate or glutamate carboxylate stretching</i>                                                                        |
| 1470                       | <i>δ(CH<sub>2</sub>) scissor</i>                                                                                                                                                                        |
| 1460–1440                  | Aliphatic C–H deformation                                                                                                                                                                               |
| 1420                       | C=N stretching of primary amides (amide III band)                                                                                                                                                       |
| 1400–1380<br>1420–1415     | Asymmetric stretching of COO <sup>-</sup> , O–H deformation and C–O stretching of phenolic OH                                                                                                           |
| 1385<br>1380               | Symmetrical stretching of COO <sup>-</sup> in carboxylic acid, NO <sub>3</sub> <sup>-</sup> (aq)<br>–H bending of CH <sub>2</sub> and CH <sub>3</sub> groups, asymmetric stretching of COO <sup>-</sup> |
| 1260–1200<br>1270–1260     | C–O stretching and OH deformation of COOH, C–O stretching of aryl ethers and phenols                                                                                                                    |
| 1280–1200                  | <i>Asymmetric and symmetric PO<sub>2</sub><sup>-</sup> stretching vibrations of nucleic acid</i>                                                                                                        |
| 1290–1280                  | <i>Amide III</i>                                                                                                                                                                                        |
| 1200–950<br>1170           | <i>Vibrations of the sugar rings of LPS</i><br><i>C–O stretching vibration related to ring of carbohydrates</i>                                                                                         |
| 1120–1140<br>1085          | <i>Asymmetric C–O–C stretching vibration of glycosidic linkage</i><br><i>Symmetric PO<sub>2</sub><sup>-</sup> band of DNA</i>                                                                           |
| 1060–1040<br>975–775       | <i>Symmetric δ(COH) stretching vibration of carbohydrates</i><br><i>Out-of-plane bending of aromatic C–H</i>                                                                                            |
| 966                        | <i>Asymmetric C–N stretching</i>                                                                                                                                                                        |
| 660–621                    | S–O stretching vibration of sulfonic groups                                                                                                                                                             |

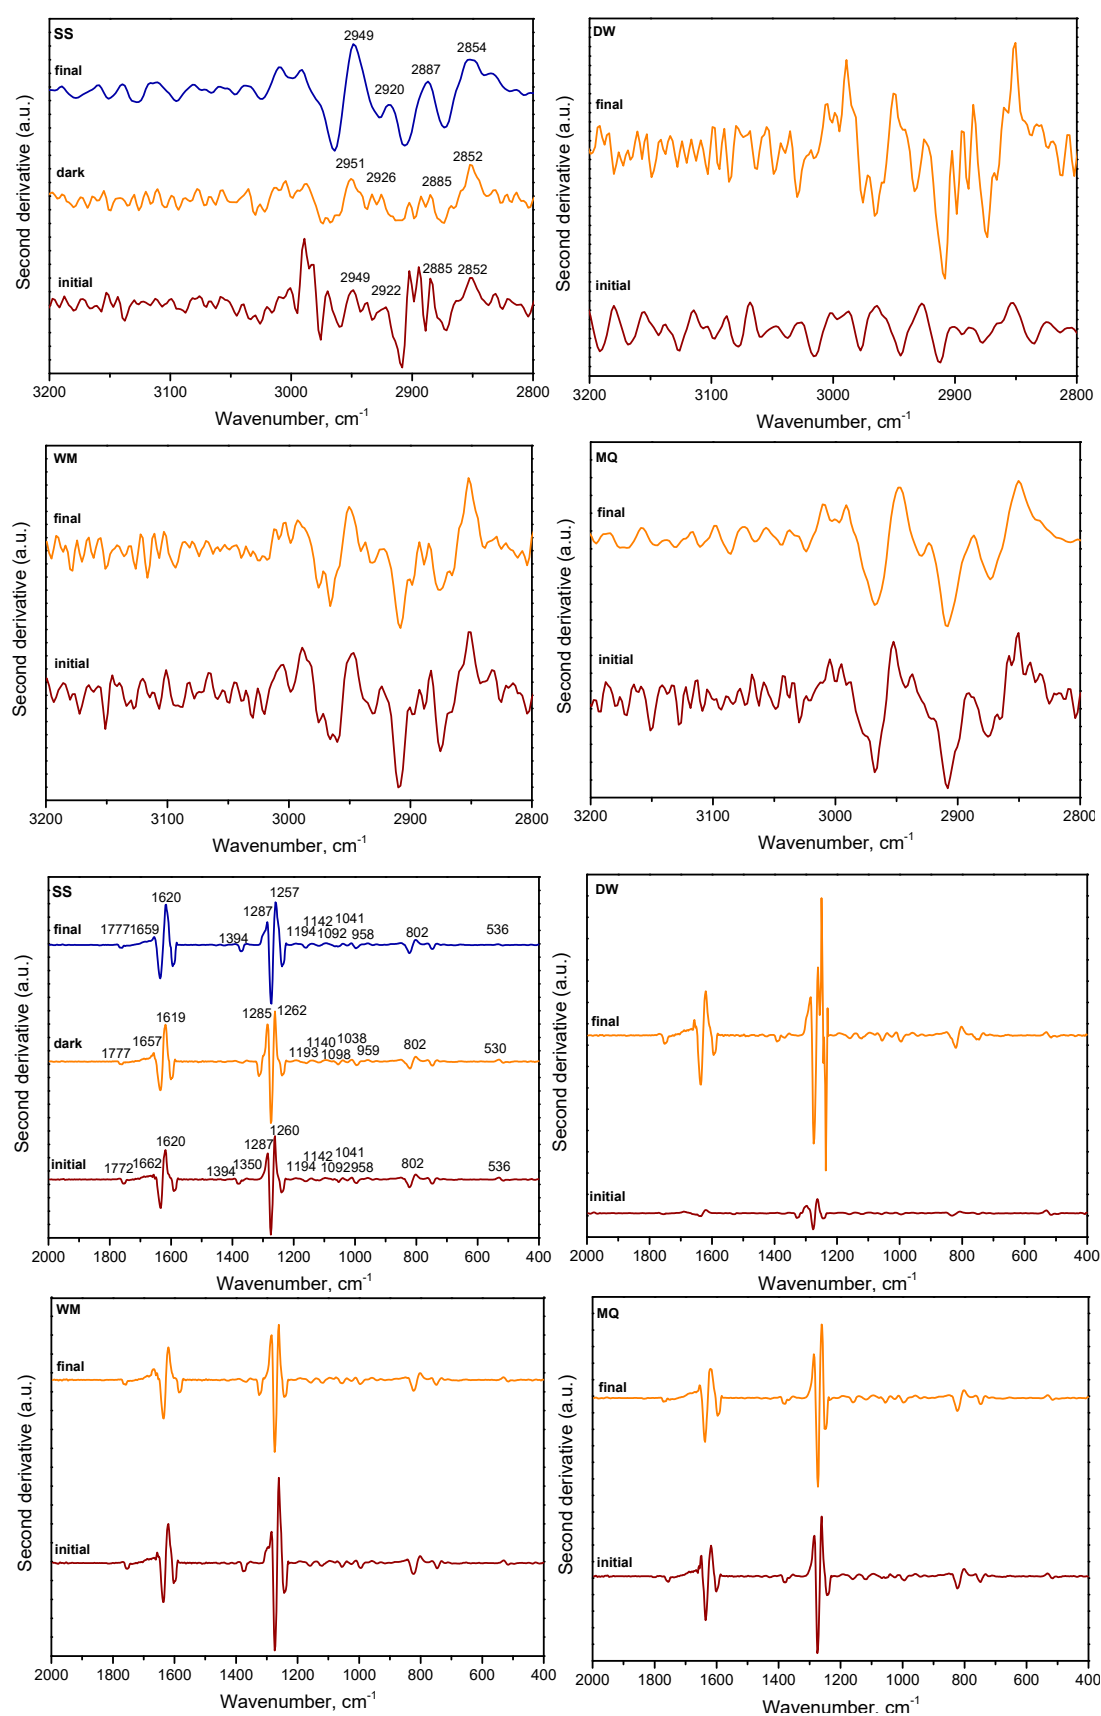

**Figure S3.** Second derivative FTIR spectra of *E. coli* and LF under various conditions in the absence of NOM compounds prior to (initial) and following (final) SPCI.

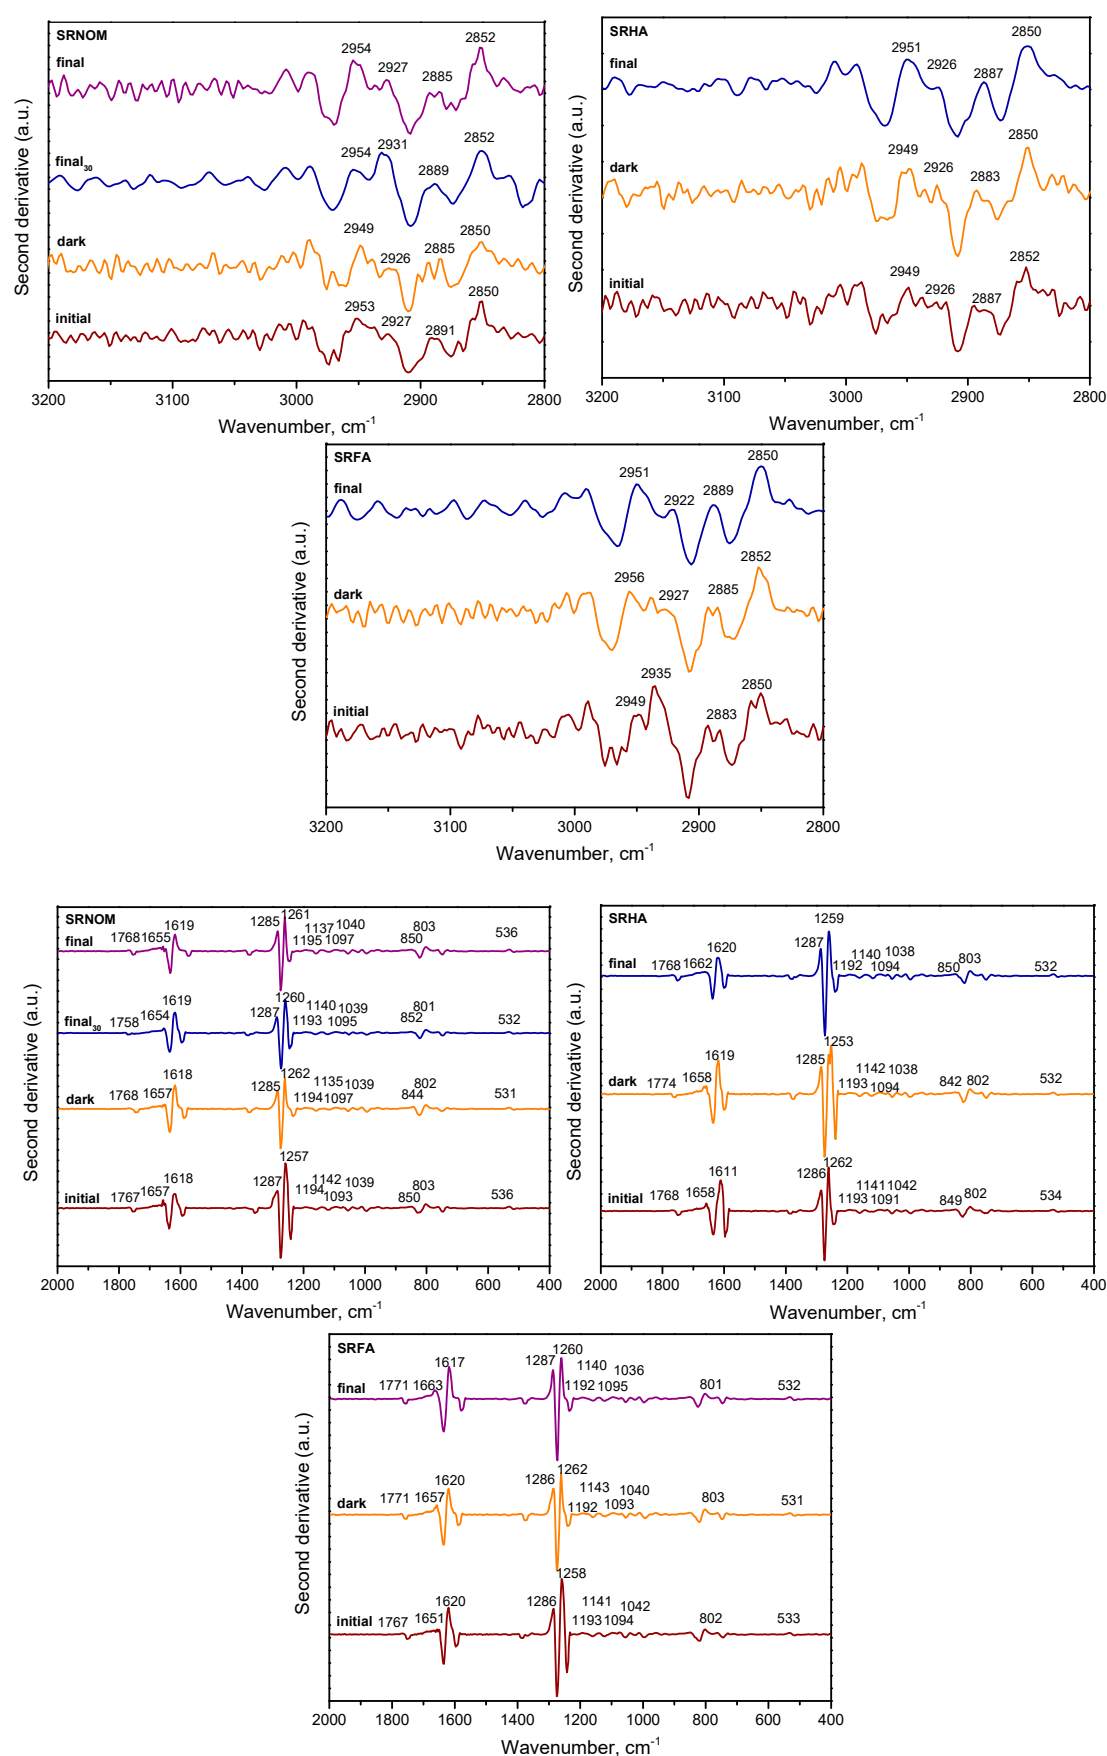

**Figure S4.** Second derivative FTIR spectra of *E. coli* and LF under various conditions in the presence of NOM compounds prior to (initial) and following (final) SPCI.

### 5. Correlation Between PARAFAC Component C1 and Protein Content Prior to and Following Solar Photocatalytic Inactivation of *E. coli* in the Absence/Presence of NOM

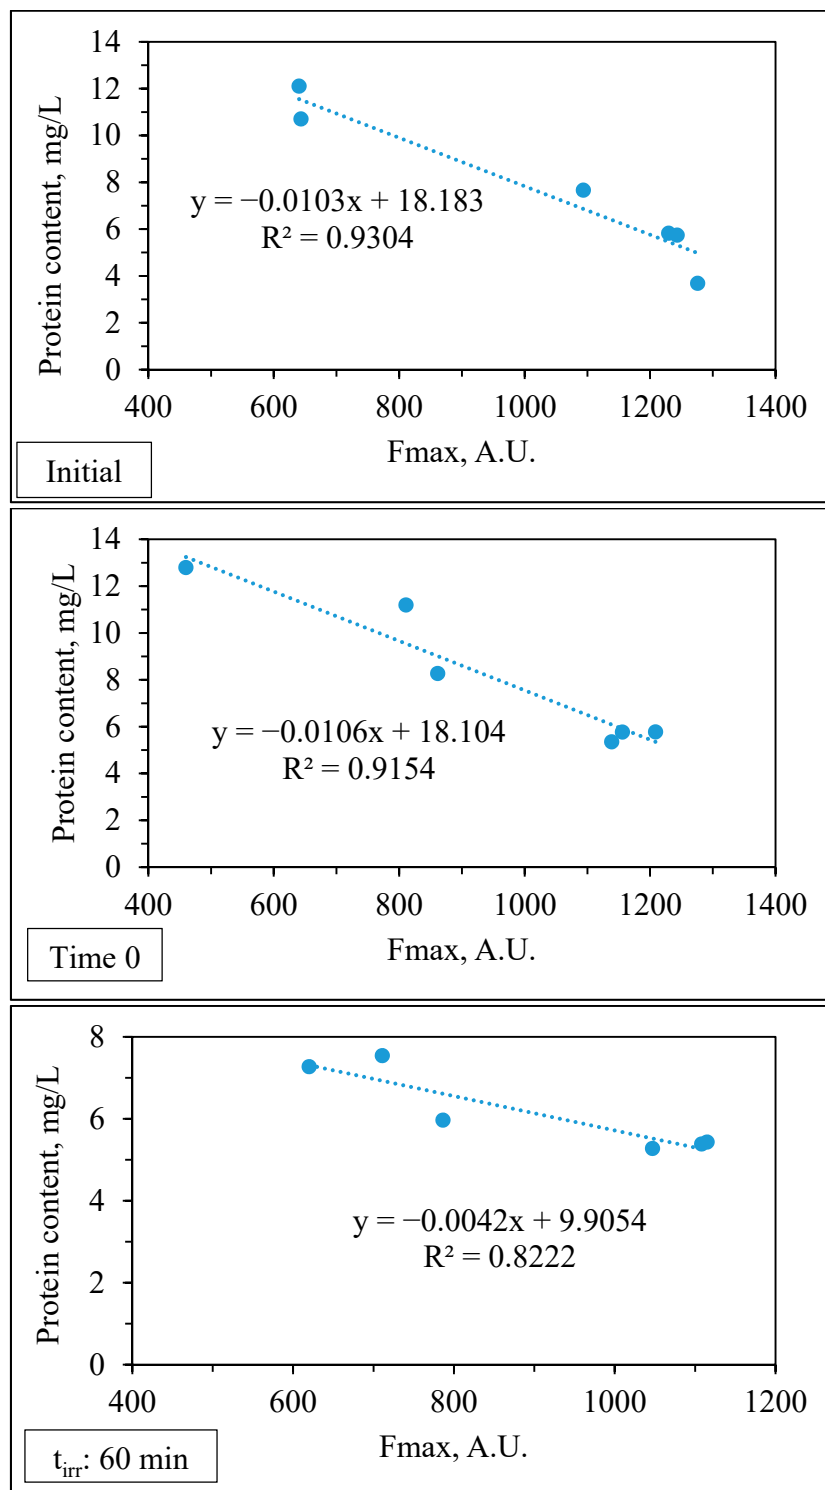

**Figure S5.** Correlation between Fmax values of PARAFAC component C1 and protein contents prior to and following solar photocatalytic inactivation of *E. coli* in the absence/presence of NOM.

## References

1. Goldstone, J.V.; Pullin, M.J.; Bertilsson, A.; Voelker, B.M. Reactions of hydroxyl radical with humic substances: Bleaching, mineralization, and production of bioavailable carbon substrates. *Environ. Sci. Technol.* **2002**, *36*, 364–372.
2. Li, Y.; Niu, J.; Shang, E.; Crittenden, J.C. Influence of dissolved organic matter on photogenerated reactive oxygen species and metal-oxide nanoparticle toxicity. *Water Res.* **2016**, *98*, 9–18.
3. Vione, D.; Falletti, G.; Maurino, V.; Minero, C.; Pelizzetti, E.; Malandrino, M.; Ajassa, R.; Olarui, R.-I.; Arsene, C. Sources and sinks of hydroxyl radicals upon irradiation of natural water. *Environ. Sci. Technol.* **2006**, *40*, 3775–3781.
4. Foote, C.S.; Wesler, S.; Corey, E.J.; Taylor, W.C. Olefin oxidation with singlet oxygen. *J. Am. Chem. Soc.* **1964**, *86*, 3879–3881.
5. Zepp, R.G.; Braun, A.M.; Hoigné, J.; Leenheer, J.A. Photoproduction of the hydrated electron from natural organic solutes in aquatic environments. *Environ. Sci. Technol.* **1987**, *21*, 485–490.
6. Larson, R.A.; Weber, E.J. Environmental Photochemistry, Chapter 6. In: *Reaction Mechanisms in Environmental Chemistry*; Lewis Publishers: Boca Raton, FL, USA, 1994.
